# Supplementary material for: 5′-end SAGE for the analysis of transcriptional start sites
Source: Springer Nature journal article supplement (doi:10.1038/nbt998), 2004-08-08
Supplement: nbt998-S4.pdf [file nbt998-S4.pdf]

Supplementary Table 2 Profile of the 5'-end transcripts in HEK293 cells.

| Tag sequence         | Tag count | Related UniGene cluster | Related refseq      | Gene                                                                             |
|----------------------|-----------|-------------------------|---------------------|----------------------------------------------------------------------------------|
| GCTGTGACAGCCACACAGC  | 286       | Hs.71346                | NM_005382           | Homo sapiens neurofilament 3 (150kDa medium) (NEF3), mRNA                        |
| CTTTCCCTGTGGCAGCAG   | 171       |                         |                     | Multiple hit to genome                                                           |
| CTCTTTCCTTGGCCTAAAG  | 127       |                         |                     | Multiple hit to genome                                                           |
| CTCTTCCGC CGTGTCCG   | 120       | Hs.75309                | NM_001961           | Eukaryotic translation elongation factor 2                                       |
| TACCTGGTTGATCCCTGCC  | 117       |                         |                     | Multiple hit to genome                                                           |
| CTGGTGTATCCCTGCCAGT  | 89        |                         |                     | Multiple hit to genome                                                           |
| AACGGGTAGCCTGAGGAG   | 83        | Hs.274402,Hs.75452      | NM_005345,NM_005346 | Heat shock 70kDa protein 1A                                                      |
| AGTAGCAGCAGCGCCGGG   | 75        | Hs.252400               | NM_031243,NM_002137 | Heterogeneous nuclear ribonucleoprotein A2/B1                                    |
| CTCATTGAACCTCGCCTGC  | 68        |                         |                     | Multiple hit to genome                                                           |
| GTGACAGCCACACGCCCC   | 66        | Hs.71346                | NM_005382           | Homo sapiens neurofilament 3 (150kDa medium) (NEF3), mRNA                        |
| AGTTCCGATCGGTAGCCGG  | 57        | Hs.71346                | NM_005382           | Multiple hit to genome                                                           |
| ACGCTGTGACAGCCACAC   | 56        |                         |                     | Homo sapiens neurofilament 3 (150kDa medium) (NEF3), mRNA                        |
| CTTTTCGCAACGGGTTT    | 55        |                         |                     | Multiple hit to genome                                                           |
| AATTTCTACGGCCACCGG   | 54        | Hs.446628               | NM_001007           | Ribosomal protein S4, X-linked                                                   |
| ACGGCCGAGACCCGCTCC   | 53        | Hs.426930,Hs.510444     | NM_001101           | Actin, beta                                                                      |
| CTTTCACCTGCAAGCGGGC  | 52        | Hs.5662,Hs.509234       | NM_006098           | Guanine nucleotide binding protein (G protein), beta polypeptide 2-like 1        |
| ATATTTCTTACTCTCTCG   | 48        |                         |                     | Homo sapiens X (inactive)-specific transcript (XIST) on chromosome X             |
| CTCAGTCCGCGCTGCCAG   | 43        | Hs.14376,Hs.500737      | NM_006708           | Actin, gamma 1                                                                   |
| ATTCCTAGTTAAGGGCGC   | 42        | Hs.268849               |                     | Glyoxalase I                                                                     |
| AAATTGTTCGCCAGCCGC   | 37        | Hs.15589                | NM_004774           | Multiple hit to genome                                                           |
| CCTCCCTATCACACGCCG   | 37        |                         |                     | PPAR binding protein                                                             |
| CTTTTCGCCCCGTGGACGC  | 37        |                         |                     | Multiple hit to genome                                                           |
| AGTACAGCTCCGGCCGCC   | 35        | Hs.402752               | NM_003487,NM_139215 | TAF15 RNA polymerase II, TATA box binding protein (TBP)-associated factor, 68kDa |
| CACCTGTTTGCAGGCTGC   | 34        | Hs.146550               |                     | Multiple hit to genome                                                           |
| CTCTCTTTCACGTCAAGG   | 33        | Hs.5662,Hs.509234       | NM_006098           | Myosin, heavy polypeptide 9, non-muscle                                          |
| AGTTGCTTCA GCGTCCCG  | 30        | Hs.446628,Hs.449634     | NM_005348           | Guanine nucleotide binding protein (G protein), beta polypeptide 2-like 1        |
| AGTTCCTCCGGCGTACGGC  | 29        | Hs.211602               | NM_006306           | Heat shock 90kDa protein 1, alpha                                                |
| GTCCGTA CTG CAGAGCCG | 29        | Hs.353170               | NM_004343           | SMC1 structural maintenance of chromosomes 1-like 1 (yeast)                      |
| AAAAACGGCCAGCCTGAGG  | 27        | Hs.75452                |                     | Calreticulin                                                                     |
| AFTTCGTCTTAGCCACGC   | 26        | Hs.202166               |                     | FLJ38698                                                                         |
| AGGCATTTGAGGACGCCAG  | 25        |                         |                     | Heterogeneous nuclear ribonucleoprotein HI (H)                                   |
| AGTGGGCCGGACCCGCCGG  | 25        | Hs.192374               | NM_003299           | Hit to genome                                                                    |
| CCCAATTTCTACGGCCAC   | 25        | Hs.446628               | NM_001007           | Tumor rejection antigen (gp96) 1                                                 |
| CTCGTTGGCAGTAGTGC    | 25        | Hs.380118,Hs.460941     |                     | Ribosomal protein S4, X-linked                                                   |
| GTGCTGCAGCCGCTGCCG   | 25        | Hs.2795                 |                     | RNA binding motif protein, X-linked                                              |
| CATTTTCGCTTAGCCACG   | 24        | Hs.202166               | NM_005566           | Lactate dehydrogenase A                                                          |
| CTCTTTCCTTAAGCAGCC   | 24        |                         |                     | Heterogeneous nuclear ribonucleoprotein HI (H)                                   |
| GACTAATTTGTTGGCGGC   | 24        | Hs.280311               |                     | Multiple hit to genome                                                           |
| ACCCTATTCA TTTCTACC  | 23        | Hs.279806               | NM_004396           | Myosin, heavy polypeptide 10, non-muscle                                         |
| CCTTTTCGCCCCGTGACG   | 23        |                         |                     | DEAD (Asp-Glu-Ala-Asp) box polypeptide 5                                         |
| AGTATCTGTGGGTACCCG   | 22        | Hs.433455,Hs.331035     | NM_001428           | Multiple hit to genome                                                           |
| CAATTTTACGGCACC      | 22        | Hs.446628               | NM_001007           | Enolase 1, (alpha)                                                               |
| GCACACAGGCATCCATCC   | 22        | Hs.107600               | NM_006158           | Ribosomal protein S4, X-linked                                                   |
| AGTGACGGGTATTTGCTG   | 19        | Hs.75337,Hs.467172      | NM_004741           | Neurofilament, light polypeptide 68kDa                                           |
| CTCTTTCAGCCAGCGCC    | 19        |                         |                     | Nucleolar and colicel-body phosphoprotein 1                                      |
| CTTTTCCGCCCGTCC      | 19        | Hs.374596               | NM_003295           | Multiple hit to genome                                                           |
| GGCTCTTGTCTTGGCTG    | 19        | Hs.180909               | NM_181696,NM_181697 | Tumor protein, translationally-controlled 1                                      |
| ATATAGAGGCTGGGGGGG   | 18        | Hs.427152               |                     | Peroxisomal protein 1                                                            |
| ATTAACCGGTTGCAGGGG   | 18        | Hs.78996,Hs.449476      | NM_002592           | High density lipoprotein binding protein (vigitin)                               |
| CCTTTTGGCTCTCTGACC   | 18        |                         |                     | Proliferating cell nuclear antigen                                               |
|                      |           |                         |                     | Multiple hit to genome                                                           |

Top 50 5'-end transcripts expressed in HEK293 cells are listed. The tag sequence represents the 18-bp SAGE tag. Tags associated with their corresponding UniGene/EST are listed. All of 5' SAGE tag data are available at <http://sage.gi.k.u-tokyo.ac.jp/>.
